# Supplementary material for: Global soil moisture storage capacity at 0.5° resolution for geoscientific modelling
Source: Copernicus journal article supplement (doi:10.5194/essd-2022-217), 2022-09-08
Supplement: Supplementary file [file essd-2022-217-AC1-supplement.pdf]

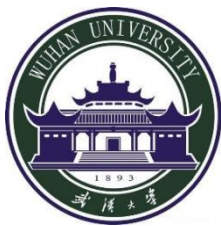

**Wuhan University**

**State Key Laboratory of Water Resources and Hydropower Engineering Science**

**Department of Hydrology and Water Resources**

Professor Pan Liu

Wuhan, China

Associate Editor, Journal of Water Resources Planning and Management, ASCE

Vice Director, State Key Laboratory of Water Resources and Hydropower Engineering Science

Head, Department of Hydrology and Water Resources

Tel: +8613871359778

Email: liupan@whu.edu.cn

**Date: October 13th, 2022**

**Dear Editor and Anonymous Referee #1,**

On behalf of my co-authors, we thank you for the constructive comments and suggestions, which significantly improved the manuscript (**NO. ESSD-2022-217**) entitled “Global soil moisture storage capacity at 0.5° resolution for geoscientific modelling”.

The manuscript has been revised based on the comments from editors and reviewers. A point-by-point response to the reviews with referencing to the lines of the manuscript is attached to this letter. All the changes are **marked in blue** in the reply.

Thank you very much for handling our manuscript. We hope that you will find it to your satisfaction and we look forward to hearing from you in the near future.

Sincerely Yours

A handwritten signature in blue ink that reads 'Pan Liu'.

Pan Liu

On behalf of all co-authors

## Response to Reviewer #1

This paper developed global soil moisture storage capacity (SMSC) map at  $0.5^{\circ} \times 0.5^{\circ}$  grid scale, which provide a great improvement on the further application of hydrologic model in ungagged area. The new SMSC data was generated by the joint calibration of three hydrologic model and expand to global by deep learning networks, and was evaluated in 20 watersheds from 5 different climate regions. Overall, this manuscript is reasonably organized, and I think this manuscript is acceptable for publication with minor revision.

### Response:

Thank you for providing the opportunity to revise further and submit the manuscript. We have studied the comments carefully and then edited the manuscript. In the following section, we summarize our responses to the comments. We believe that our responses have well addressed all concerns.

### Specific comments

1. Line 27: “SMSC[L]” to “SMSC”

### Response:

We appreciate your comments.

Soil moisture storage capacity (SMSC) is defined as the total amount of water stored in the soil within the plant root zone, one of the essential parameters linking the atmosphere and terrestrial ecosystems in the hydrological components (Chen, 2014; McCormick et al., 2021).

Chen, B.: Analysis of hydrologic systems at multiple spatial scales and its implications for aggregating hydrologic process, Dissertations & Theses Gradworks, 2014.

McCormick, E. L., Dralle, D. N., Hahm, W. J., Tune, A. K., Schmidt, L. M., Chadwick, K. D., and Rempe, D. M.: Widespread woody plant use of water stored in bedrock, *Nature*, 597, 225-229, 10.1038/s41586-021-03761-3, 2021.

2. Line 99-100: According to Table 1, “1902 to 2014” means January 1902 to December 2014, hence there are 113 years in total. But in line 100, “first year..., 80 years..., 30 years...” only 111 years in all. Besides, does it enough to have only one year warming-up period? I suggest to have 3-5 years for warming-up.

### Response:

Thank you for the valuable suggestion.

The data for the first 3 years is used for warm-up, 80 years for calibration, and the remaining 30 years for validation.

3. Line 152: Please specify the calculation method of the  $E_m$ .

**Response:**

Thank you.  $E_m$  is the evaporation capacity of the basin, generally calculated from meteorological data (Wang et al., 2014). The  $E_m$  is calculated by the Priestly-Taylor equation (Du Bruin et al, 1979). Meteorological data are required, including the temperature, the atmospheric pressure, the humidity, and the net radiation.

$$E_m = \alpha_e \frac{\Delta}{\Delta + \gamma} (R_n - G)$$

where  $\alpha_e$  is the so-called Priestly-Taylor parameter which is taken as 1.26 if simplified,  $\Delta$  is the slope of the saturation specific humidity-temperature curve,  $\gamma$  is parameter of the heat of air at constant pressure,  $R_n$  is the net radiation, and  $G$  is the surface heat flux.

Wang, G., Zhang, J., Jin, J., Liu, Y., He, R., Bao, Z., Liu, C., and Li, Y.: Regional calibration of a water balance model for estimating stream flow in ungauged areas of the Yellow River Basin, Quaternary International, 336, 65-72, 10.1016/j.quaint.2013.08.051, 2014.

De Bruin H A R, Keijman J Q. The Priestley-Taylor evaporation model applied to a large, shallow lake in the Netherlands[J]. Journal of Applied Meteorology, 898-90310.1175/1520-0450(1979)018<0898:TPTEMA>2.0.CO;2. 1979.

4. Line 161: “SC” to “SMSC”

**Response:**

Thank you very much. This part is revised as follows:

where  $S(t)$  is the soil humidity at the beginning of the period, **SMSC** is the saturated soil humidity,  $P$  is rainfall,  $g_1$  and  $g_2$  are the related parameters of the time-varying gain factor, where  $g_1$  is the runoff coefficient after soil saturation,  $g_2$  is the soil moisture influence coefficient.

5. Line 290: In figure 2(d), there is an increasing trend from  $-30^\circ$  to  $-50^\circ$  latitude. It's not decreasing towards the South Pole. Could you explain it?

**Response:**

Sorry for the confusion. This is mainly due to the limitations from the runoff data. Because there is no available measured runoff information in the south of  $50^\circ\text{S}$  mainly for the land of Antarctica and the ocean. Additionally, the GRUN grid runoff product is only available from  $90^\circ\text{N}$  to  $50^\circ\text{S}$ . The range of figure 2(d) has been modified as follows:

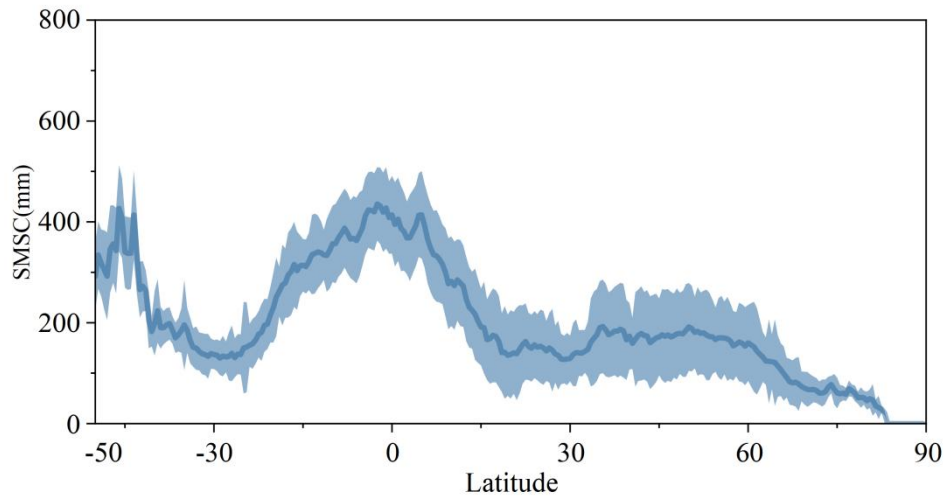

**Figure 2.** Spatial distribution of labels and construction results for global soil moisture storage capacity (SMSC) parameters. (d) The distribution of variations of global SMSC with latitude.

6. Line 334: “snowbelt” to “snowmelt”

**Response:**

Thank you. Sorry for this mistake. The sentence is revised as follows:

These three models do not take the temperature as the input, and therefore the **snowmelt** module is not considered.

7. Line 647: Table 4, could you add a column to list the climate zone of each catchment?

**Response:**

Thanks for your suggestions. A column is added to list the climate zone of each catchment as follows. The Köppen-Geiger climate classification can be download in <https://doi.org/10.1038/sdata.2018.214>.

**Table 4. Validation of global SMSC parameters in typical catchments.**

| Number   | Site name    | Longitude | Latitude | Drainage area (km <sup>2</sup> ) | Climate zone <sup>1</sup> | River         | KGE (%) of DWBM model |                  | KGE (%) of SWBM model |       | KGE (%) of TVGM model |       | Basin average SMSC (mm) |
|----------|--------------|-----------|----------|----------------------------------|---------------------------|---------------|-----------------------|------------------|-----------------------|-------|-----------------------|-------|-------------------------|
|          |              |           |          |                                  |                           |               | Cal <sup>2</sup>      | Val <sup>3</sup> | Cal                   | Val   | Cal                   | Val   |                         |
| 1196551  | Beibrug      | 29.99     | −22.23   | 201001                           | Bsh                       | Limpopo       | 47.06                 | 74.15            | 53.25                 | 69.67 | 43.11                 | 41.67 | 149.84                  |
| 2181500  | Zhimenda     | 96.6      | 33.43    | 137704                           | ET                        | Tongtian      | 49.54                 | 72.26            | 69.95                 | 77.82 | 84.71                 | 80.09 | 121.48                  |
| 2181900  | Datong       | 117.62    | 30.77    | 1705383                          | Cfa                       | Yangtze       | 55.87                 | 84.52            | 86.48                 | 91.88 | 85.75                 | 91.16 | 206.85                  |
| 2260500  | Sagaing      | 96.1      | 21.98    | 117900                           | Aw                        | Irrawaddy     | 78.27                 | 76.35            | 70.93                 | 68.64 | 63.22                 | 56.99 | 365.65                  |
| 2694450  | Waegwan      | 128.39    | 36       | 11195                            | Dwa                       | Naktong       | 67.81                 | 58.89            | 66.63                 | 41.78 | 77.99                 | 44.93 | 231.37                  |
| 3268270  | Caimancito   | −64.47    | −23.73   | 25800                            | Bsk                       | San Francisco | 67.54                 | 78.11            | 53.66                 | 83.31 | 63.44                 | 63.55 | 228.89                  |
| 3618090  | Cucui        | −66.85    | 1.22     | 61781                            | Af                        | Negro         | 69.13                 | 72.83            | 69.54                 | 67.53 | 89.36                 | 89.72 | 226.27                  |
| 3624120  | Gaviao       | −66.85    | −4.84    | 162000                           | Af                        | Jurua         | 49.13                 | 66.07            | 71.06                 | 69.88 | 88.35                 | 80.24 | 532.84                  |
| 3627030  | Manicore     | −61.30    | −5.82    | 1126700                          | Af                        | Madeira       | 87.15                 | 71.24            | 68.83                 | 72.46 | 73.24                 | 86.55 | 370.19                  |
| 3629000  | Obidos-Porto | −55.51    | −1.95    | 4640300                          | Af                        | Amazonas      | 73.55                 | 80.47            | 58.66                 | 58.92 | 57.02                 | 54.63 | 388.80                  |
| 3629150  | Fortaleza    | −57.64    | −6.05    | 358657                           | Am                        | Tapajos       | 39.03                 | 49.10            | 87.55                 | 74.90 | 75.24                 | 63.62 | 428.36                  |
| 3650745  | Ico          | −38.87    | −6.41    | 12000                            | Bsh                       | Salgado       | 39.22                 | 46.87            | 54.93                 | 63.24 | 58.56                 | 94.82 | 392.60                  |
| 4103800  | Eagle AK     | −141.20   | 64.79    | 293965                           | Dfc                       | Yukon         | 70.56                 | 77.55            | 36.05                 | 46.80 | 37.01                 | 38.99 | 95.21                   |
| 4115100  | Salem, OR    | −123.04   | 44.94    | 18855                            | Dsb                       | Willamette    | 86.86                 | 89.73            | 80.01                 | 86.28 | 59.46                 | 66.52 | 475.76                  |
| 4115201  | Beaver, OR   | −123.18   | 46.18    | 665371                           | Dsb                       | Columbia      | 58.60                 | 47.52            | 79.14                 | 76.35 | 88.81                 | 74.00 | 358.43                  |
| 4119100  | Paul, MN     | −93.11    | 44.93    | 95312                            | Cfa                       | Mississippi   | 22.95                 | 14.15            | 60.29                 | 23.76 | 60.88                 | 55.06 | 186.30                  |
| 4146281  | Verona, CA   | −121.60   | 38.77    | 55040                            | Csa                       | Sacramento    | 43.65                 | 64.24            | 70.63                 | 60.40 | 89.41                 | 88.84 | 344.22                  |
| 5109170  | Rockfields   | 142.88    | −18.20   | 10987                            | Bsh                       | Gilbert       | 52.02                 | 76.95            | 13.20                 | 50.34 | 73.34                 | 52.15 | 245.60                  |
| 6335180  | Worms        | 8.38      | 49.64    | 68827                            | Cfb                       | Rhine         | 73.97                 | 76.66            | 78.43                 | 84.00 | 76.88                 | 78.37 | 296.07                  |
| 6342800  | Hofkirchen   | 13.12     | 48.68    | 47496                            | Cfb                       | Danube        | 56.53                 | 46.58            | 61.31                 | 53.67 | 69.49                 | 61.30 | 247.41                  |
| Mean KGE |              |           |          |                                  |                           |               | 59.42                 | 66.21            | 64.53                 | 66.08 | 70.76                 | 68.16 | —                       |

<sup>1</sup> Köppen-Geiger climate classification

<sup>2</sup> Calibration period

<sup>3</sup> Validation period

Beck, H.E., N.E. Zimmermann, T.R. McVicar, N. Vergopolan, A. Berg, E.F. Wood: Present and future Köppen-Geiger climate classification maps at 1-km resolution, Scientific Data 5:180214, doi:10.1038/sdata.2018.214 (2018).
